# Supplementary material
Source: publisher figshare collection journal article supplement (https://acs.figshare.com/ndownloader/files/4673854)
Supplement: Supplementary file 1 [file 4673854]

**Supporting Information For:**  
**Use of a Genetically Engineered Protein for the Design of a  
Multivalent MRI Contrast Agent**

Lindsay S. Karfeld,<sup>§~</sup> Steve R. Bull,<sup>^~</sup> Nicolynn E. Davis,<sup>§</sup> Thomas  
J. Meade,<sup>^+ #</sup> Annelise E. Barron<sup>§^\* ⊥</sup>

*Departments of Chemical and Biological Engineering, Chemistry, and  
Biochemistry and Molecular and Cell Biology, and Feinberg School of  
Medicine, Northwestern University, Evanston, IL 60208*

\*Corresponding author: Annelise E. Barron, Department of Bioengineering, Stanford University, W300B James H. Clark Center, 318 Campus Drive, Stanford, CA 94305-5440; Phone: (650) 725-7665; Fax: (650) 723-8544; Email: annelise.barron@stanford.edu

<sup>§</sup>Department of Chemical and Biological Engineering

<sup>^</sup>Department of Chemistry

<sup>+</sup>Department of Biochemistry and Molecular and Cell Biology

<sup>#</sup>Feinberg School of Medicine

<sup>~</sup>Both authors contributed equally

<sup>⊥</sup>Present address: Department of Bioengineering, Stanford University, W300B James H. Clark Center, 318 Campus Drive, Stanford, CA 94305-5440; Phone: (650) 725-7665; Fax: (650) 723-8544; Email: annelise.barron@stanford.edu

## **Materials and Instruments**

Unless otherwise noted, all starting materials were obtained from commercial sources and used without further purification. Analytical TLC was performed on Merck KgaA silica gel 60 F254 TLC plates. Silica for flash chromatography was ICN Silitech 32-63 D 60 Å.  $^1\text{H}$  NMR spectra were recorded on Varian 500, 400 or 300 MHz NMR spectrometers.  $^{13}\text{C}$  NMR spectra were on a Varian 500, 400 or 300 MHz NMR spectrometer. MALDI-TOF mass spectrometry was performed on a PE Voyager DE-Pro MALDI-TOF-MS instrument. Relaxivity measurements were performed in triplicate using a Bruker mq60 NMR Analyzer (Bruker Canada, Milton, Ont., Canada). Inductively coupled plasma mass spectrometry (ICP-MS) was used to determine Gd(III) concentration and was performed on a Thermo Jarrell Ash Atomscan Model 25 Sequential ICP Spectrometer.

## **Synthesis of the gene for the protein polymer**

The cloning of the gene for the protein polymer was accomplished through first polymerase chain reaction (PCR) amplifying the single-stranded oligonucleotide sequence of three repeats of the monomer unit, shown in Figure S1. This construct was then digested with the enzyme Eam1104 I to create adhesive ends on the gene. It was allowed to self ligate and form a multimer and then ligated into a pUC18 cloning plasmid. To create a controlled doubling of a multimer, the insert in the pUC18 plasmid was amplified through PCR with primers that eliminate one of the Sap I sites that flank the insert in the pUC18 plasmid. Two different batches of the PCR amplified insert were separately digested by Eam1104 I and Sap I. The phosphate group of the Eam1104 I

digested batch was removed through digestion with calf intestinal phosphatase and the two batches were subsequently ligated together. After replacing the phosphate group by using T4 polynucleotide kinase and another Eam1104 I digestion, the gene was ligated into the pUC18 plasmid and transformed into novablue cloning cells. This process was repeated with the previous gene product from the cloning plasmid to obtain the desired length of the protein polymer. All enzymes are from New England Biolabs except for Taq polymerase, which is from Promega.

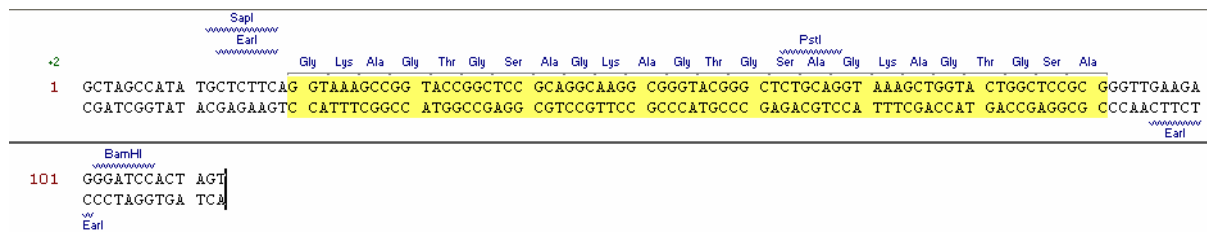

**Figure S1:** Oligonucleotide sequence used for three repeats of the monomer unit. The Sap I and Ear I (Eam 1104 I) sites are identified.

## Synthesis and characterization of protein polymers

The gene for (GKAGTGSA)<sub>30</sub> was Eam1104 I digested out of the pUC18

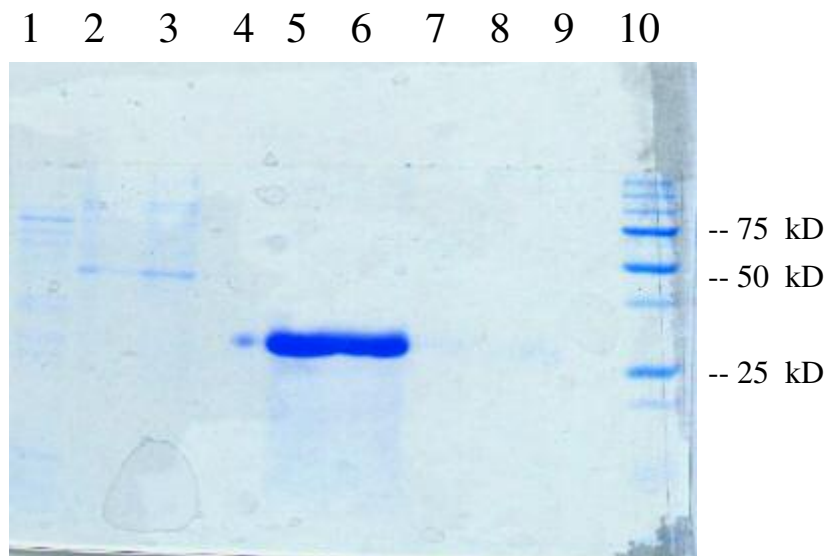

**Figure S2:** PAGE of protein polymer nickel affinity purification. Lane 1: flow through. Lane 2: guanidine hydrochloride buffer wash. Lane 3: 10 mM imidazole wash. Lane 4: 20 mM imidazole wash. Lane 5: elution 1 with 250 mM imidazole. Lane 6: elution 2. Lane 7: elution 3. Lane 8: elution 4. Lane 9: elution 5. Lane 10: molecular weight marker.

plasmid, ligated into the pET19b plasmid and then transformed into chemically competent *E. coli* strain BLR(DE3) cells. Cultures were grown in 1L of Difco Terrific Broth (Fisher Scientific) supplemented with ampicillin (Sigma, 200 µg/mL) and tetracycline (ICN Biomedicals, 12.5 µg/mL). After reaching an OD<sub>600</sub> of 0.6 to 0.8, the cultures were induced with 1 mM of isopropyl thiogalactoside (IPTG) (US Biologicals) and harvested after 3-4 hours with centrifugation (20 min, 4000 rpm, 4 °C). The supernatant was decanted and the cell pellet was frozen overnight in a -20 °C freezer, thawed, and then resuspended in a 6 M guanidine hydrochloride, 20 mM sodium phosphate, 500 mM NaCl, pH 7.8 buffer. After three freeze (-80 °C)/thaw cycles, the cell suspension was sonicated and centrifuged for 30 minutes at 8000 rpm, 4 °C. The protein is expressed as a fusion protein with a 10X histidine tag for purification by nickel affinity chromatography. The supernatant was purified with Chelating Sepharose Fast Flow nickel resin (GE Healthcare) under denaturing conditions with 250 mM imidazole competitive elution (Invitrogen procedure). The elutions, which were determined via sodium dodecyl sulfate polyacrylamide gel electrophoresis (SDS-PAGE) (Figure S2), were dialyzed batchwise against deionized water for three days. After lyophilization, the dried solid was resuspended in deionized water and filtered with a 0.45 µm polytetrafluoroethylene (PTFE) syringe filter. The filtered solution was then lyophilized.

The protein was analyzed with matrix assisted laser desorption ionization time of flight mass spectrometry (MALDI-TOF MS) (Perseptive Biosystems Voyager Pro DE) using a 2-(4-Hydroxyphenylazo)benzoic acid (HABA) matrix (Figure S3).

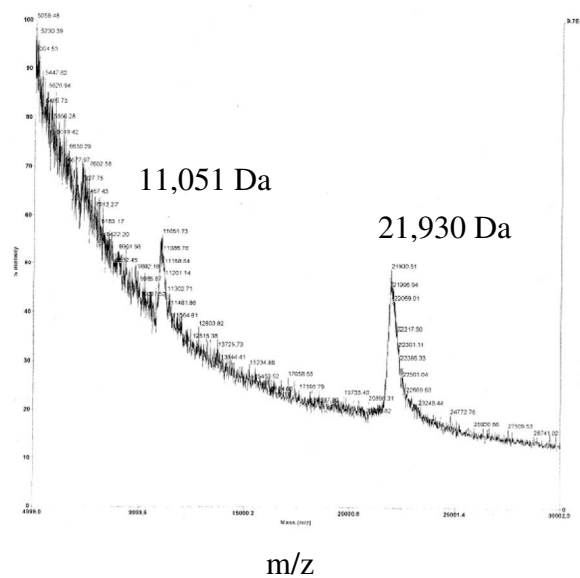

**Figure S3:** MALDI of nickel affinity chromatography purified protein polymer. The mass detected for  $z=1$ , 21,930 Da is a little higher than the calculated mass of 21,825 Da.

Circular dichroism (CD) was performed at 25 °C in water using a Jasco J-715 CD Spectrophotometer. The CD spectrum shown in Figure S4 indicates that the protein is random coil.

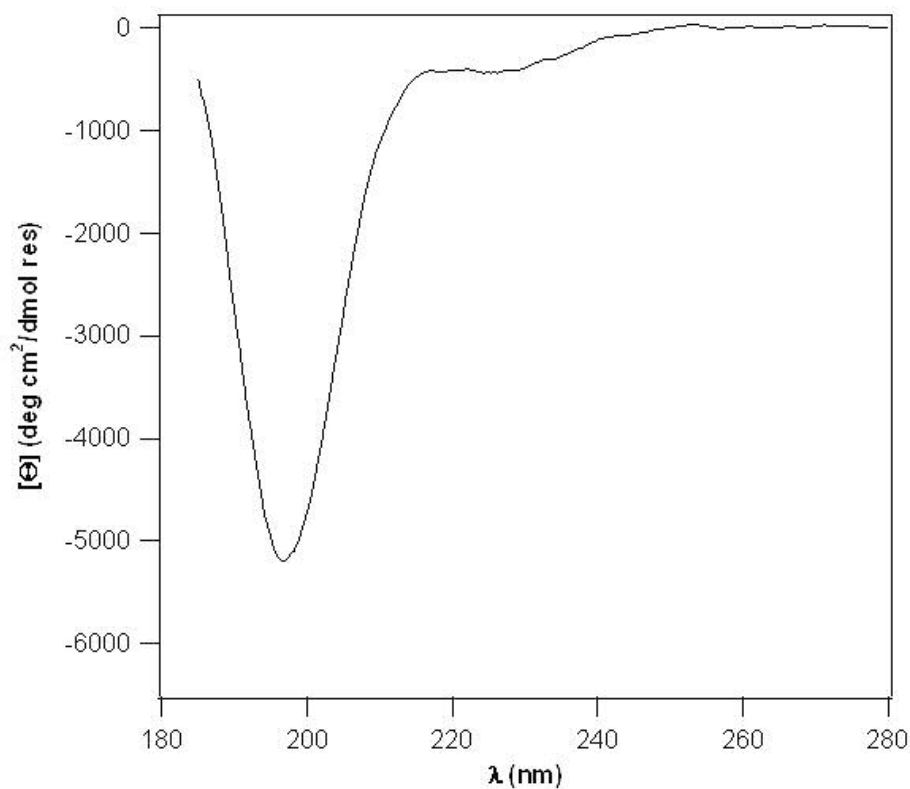

**Figure S4:** Circular Dichroism spectrum of (GKAGTGSA)<sub>30</sub> in water at 25 °C.

## Synthesis of the DOTA-based Gd(III) chelator

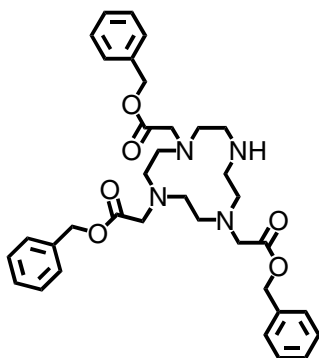

Synthesis of **2**: In a dry round bottom flask was combined cyclen (2.89 g, 17 mmol), sodium bicarbonate (4.71 g, 56 mmol) and dry acetonitrile (200 mL). The solution was stirred under N<sub>2</sub>, for 5 minutes and a solution of dry acetonitrile (30 mL) and benzyl bromoacetate (11.6 g, 51 mmol) was added dropwise. The reaction proceeded overnight then the solid was filtered, and the solvent was removed by rotary evaporation. Flash chromatography was performed on silica gel using water saturated with KNO<sub>3</sub>/H<sub>2</sub>O/ACN in a ratio of 1/9/90 to give a white hygroscopic solid (10 g, 68% yield). <sup>1</sup>H NMR (500 MHz, CDCl<sub>3</sub>) δ 7.34 (bs, 15H), 5.12 (s, 6H), 3.48 (s, 4H), 3.42 (s, 2H), 3.08 (s, 4H), 2.88-2.83 (bm, 12H): <sup>13</sup>C (125 MHz, CDCl<sub>3</sub>) δ 171.09, 170.28, 135.44, 128.79, 128.72, 128.66, 128.55, 66.71, 57.28, 51.55, 49.42, 47.38. ESI MS (methanol) Calcd. 616.33, found 639.63 M+Na.

SQU 12.71.

Handwritten signature or initials.

SDV12771  
expi s2pu1  
SAMPLE  
date Jun 26 2006 DEC. 8 VT  
solvent CDCl3 125.673  
file exp  
ACQUISITION  
sfrq 499.748 dm min  
cp 1.993 dmf 200  
mp 10000.3 dres 1.0  
sw not used homo PROCESSING n  
fb 60 1b 1.00  
tpwr 10.0 wfile ft  
pw 1.000 proc not used  
di 0 16 match  
cl 16 werr  
atlock gain 10 wexp  
flags n wft  
ij n  
in y  
dp y  
hs nm  
DISPLAY  
sp -32.6  
wp 5101.6  
ve 275  
sc 250  
h2mm 20.41  
ls 360.59  
rfi 2504.3  
rfd 0  
ins 1  
ai 6.000  
ph

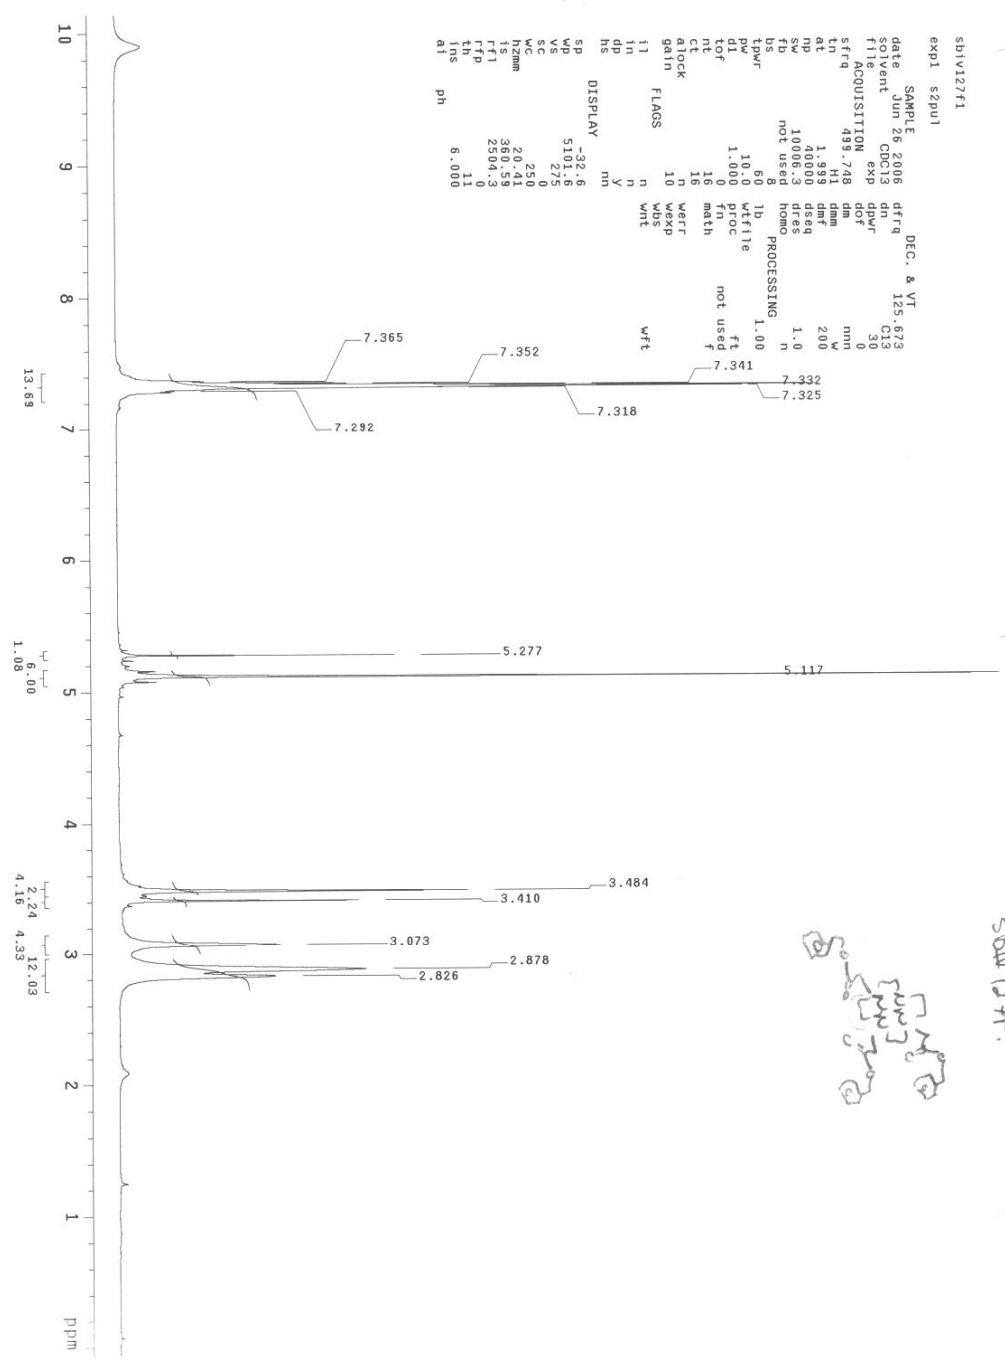

exp2 s2pul

100

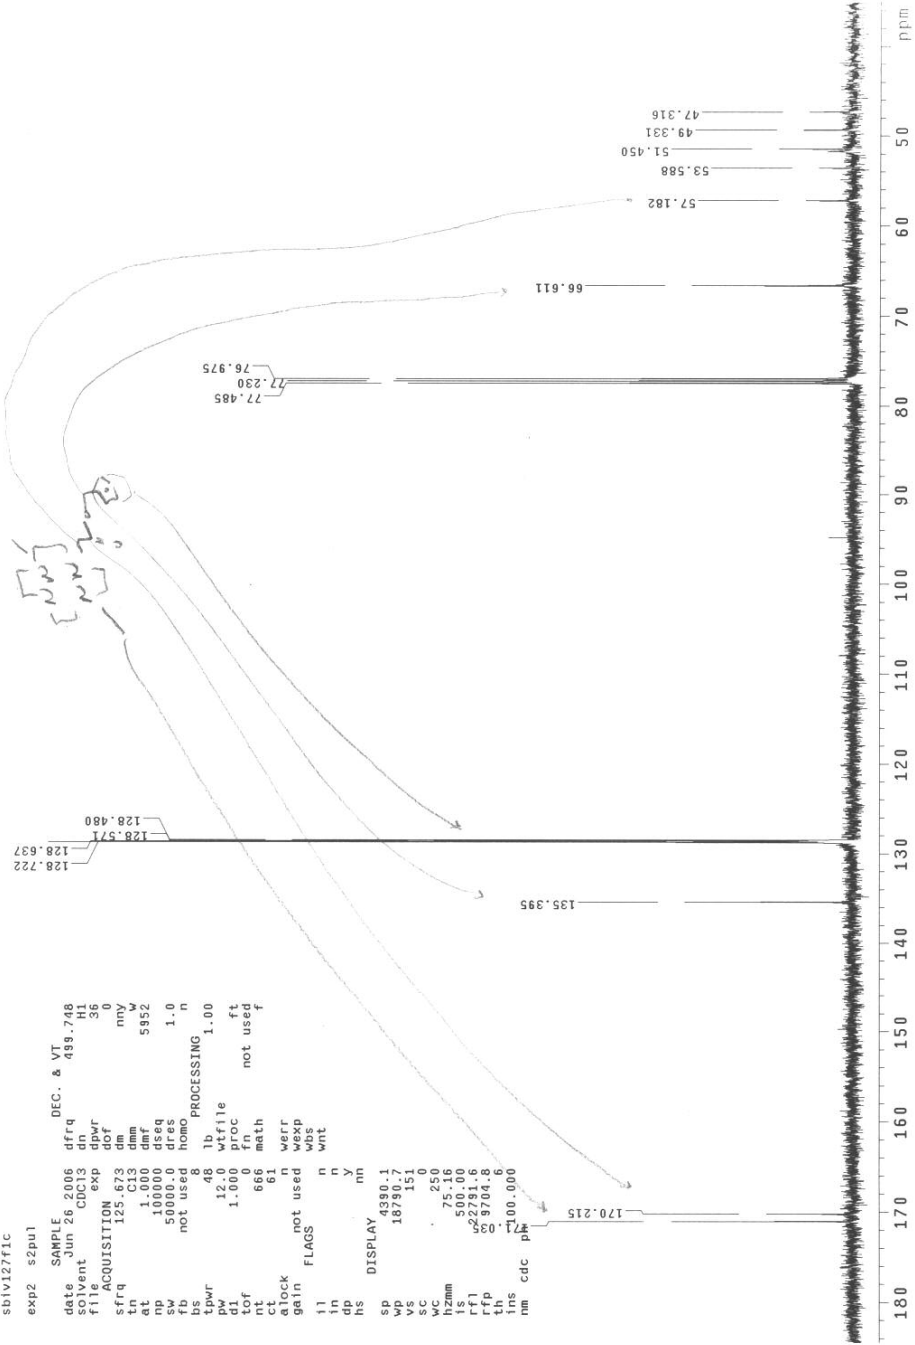



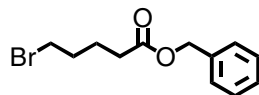

Synthesis of benzyl 5-bromopentanoate (**3**): In a dry roundbottom flask was combined 5-bromo valeric acid (2.00 g, 11 mmol), DTPS (3.56 g, 12.1 mmol), DIPC (1.81 g, 14.3 mmol) and DCM (200 mL). The solution was stirred for 5 minutes and a solution of benzyl alcohol (1.79 g, 16.6 mmol) and DCM (10 mL) was added dropwise. The reaction proceeded overnight then was diluted in DCM and washed with H<sub>2</sub>O three times, dried over MgSO<sub>4</sub>, the the solvent was removed by rotary evaporation. Flash chromatography was performed using 5/95 MeOH/DCM to afford a clear liquid (2.82 g, 95% yield). <sup>1</sup>H NMR (500 MHz, CDCl<sub>3</sub>) δ 7.36 (bs, 5H), 5.14 (s, 2H), 3.43 (t, *J*=7 Hz, 2H), 2.41 (t, *J*=7 Hz, 2H), 1.90 (q, *J*=7 Hz, *J*=14 Hz, 2H), 1.83 (q, *J*=7 Hz, *J*=14 Hz, 2H): <sup>13</sup>C (125 MHz, CDCl<sub>3</sub>) δ 173.19, 136.19, 128.86, 128.54, 128.51, 66.55, 33.53, 33.33, 32.21, 23.74. ESI MS (methanol) Calcd. 270.03, found 271.23 M+H.

H1\_std p-500 bb\_5mm RT Nonspin

exp1 s2pul

SAMPLE DEC. & VT  
date Apr 14 2005 dfrq 125.673  
solvent CDCl3 dn C13  
file ACQUISITION exp dpr 50  
\$frq 499.748 dpr 0  
at 2.000 dnm 200  
nt 2.000 dnm 200  
np 40000 dseq 1.0  
sw 10000.0 dres n  
fb 6000 homo n  
bs 8 lb PROCESSING  
tpwr 60 wtfile 1.00  
pw 10.0 proc ft  
d1 1.000 fn not used  
nt 0 fn  
ct 16 math  
a16k n  
gain 10 werr  
flags n wexp  
il n wnt  
in n  
dp n  
hs nn  
DISPLAY  
sp -12.0  
wp 4027.8  
vs 137  
sc 0  
wc 250  
h2mm 46.11  
s 38.95  
r1 58.95  
rfp 3833.1  
th 3833.8  
ins 2.000  
al

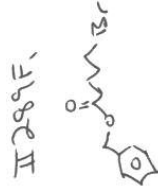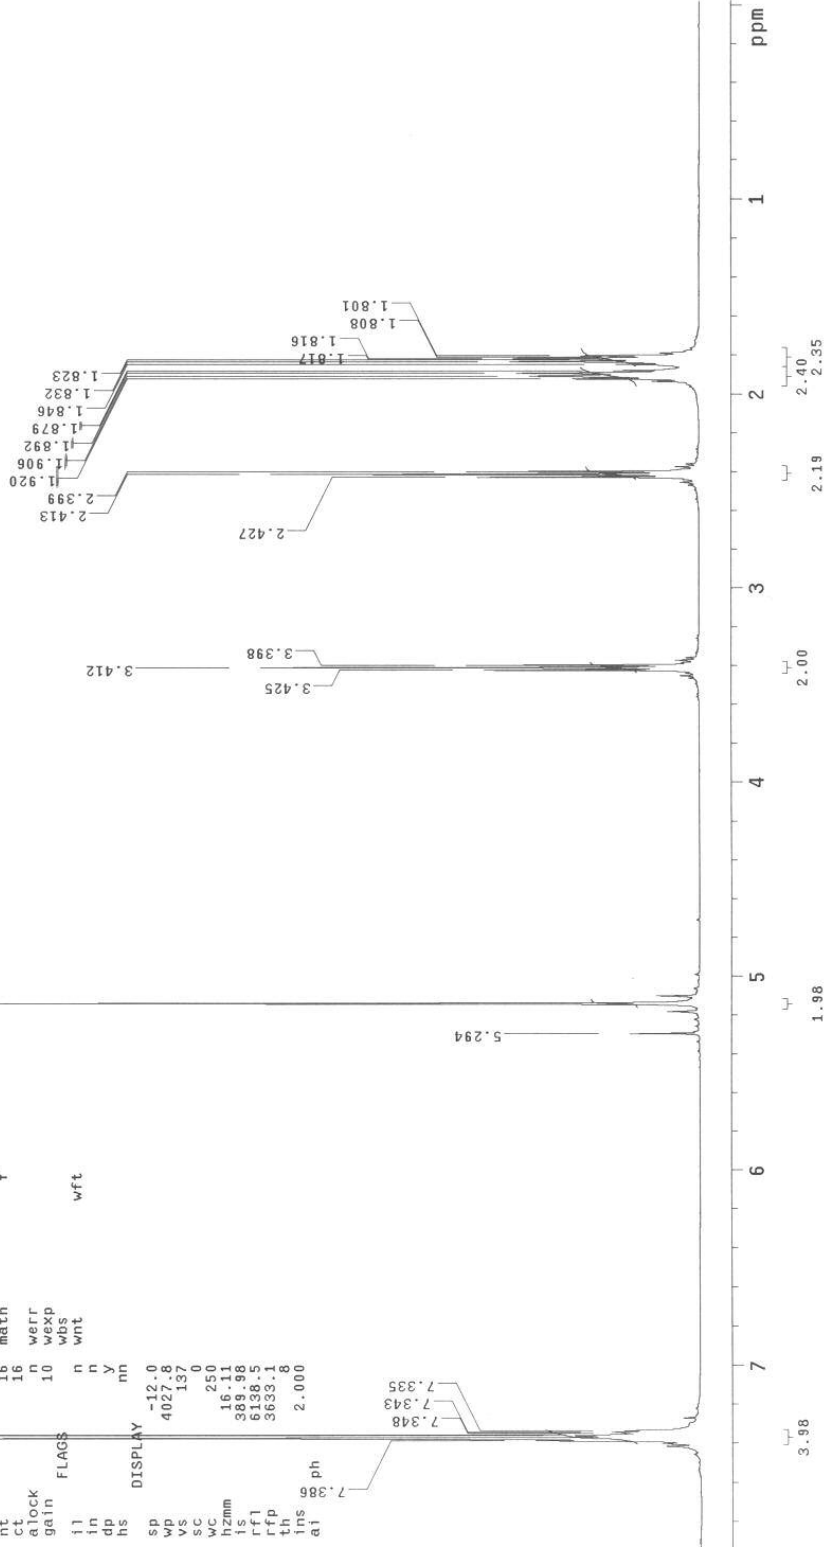

C13\_std p-500 hb\_5mm RT nonspin  
exp2 s2pu1

SAMPLE DEC. & VT  
date Apr 14 2005 dfrq 499.748  
solvent CDC13 dn H1  
file exp dpr 36  
ACQUISITION dof 0  
sfreq 125.673 dm nny  
tn C13 dmm w  
at 1.000 dmf 5952  
np 100000 dseq  
sw 50000.0 dres 1.0  
fb 28000 homo  
bs 8 PROCESSING 1.00  
tpwr 48 lb  
pw 12.0 wfile  
di 1.000 proc ft  
tof 0 fn not used  
nt 666 math  
ct 44  
atlock n  
gain not used  
flags not used  
i1 n  
in y  
dp y  
hs n  
DISPLAY  
sp -1168.6  
wp 26406.5  
vs 86  
sc 0  
wc 250  
hzm 105.63  
is 500.00  
rfi 13060.7  
rfl 0  
th 9  
ins 100.000  
nm cdc ph

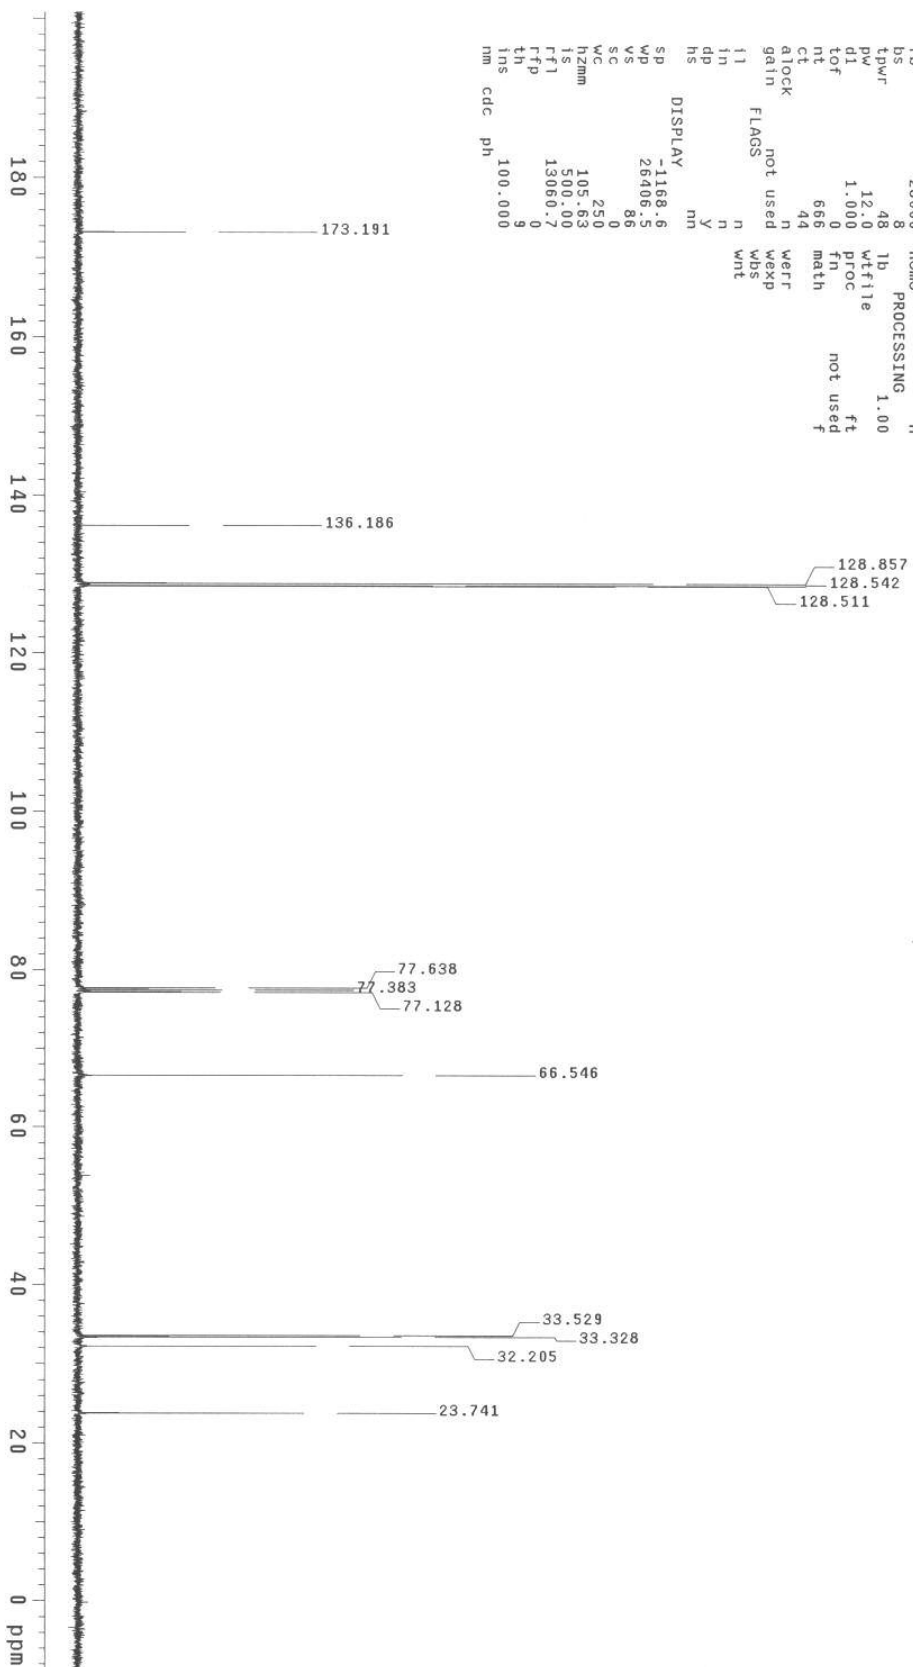

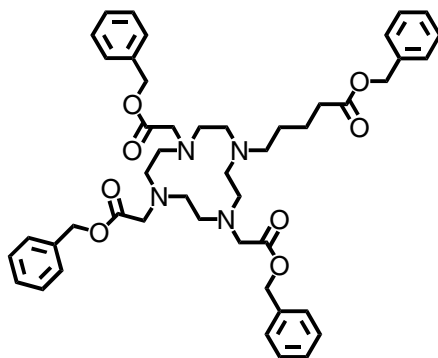

Synthesis of **4**: In a dry roundbottom flask was combined **2** (0.35 g, 0.57 mmol), potassium carbonate (0.235 g, 1.7 mmol) and dry acetonitrile (30 mL). The solution was stirred under N<sub>2</sub>, for 5 minutes and a solution of dry acetonitrile (5 mL) and benzyl 5-bromopentanoate (**3**) (0.169 g, 0.74 mmol) was added dropwise. The reaction proceeded overnight then the solid was filtered, and the solvent was removed by rotary evaporation. Flash chromatography was performed using 1/9/90 KNO<sub>3</sub>/H<sub>2</sub>O/ACN to give a white hygroscopic solid (0.458 g, 70% yield). <sup>1</sup>H NMR (500 MHz, CDCl<sub>3</sub>) δ 7.28 (bs, 20H), 5.07 (s, 8H), 3.63-2.28 (bm, 24H), 1.65 (s, 4H), 1.48 (m, 2H), 1.35 (m, 2H): <sup>13</sup>C (125 MHz, CDCl<sub>3</sub>) δ 172.77, 170.98, 170.57, 135.83, 135.45, 135.22, 134.96, 128.66, 128.62, 128.57, 128.51, 128.41, 128.30, 128.24, 128.18, 66.67, 66.43, 66.26, 56.09, 53.00, 52.72, 52.44, 50.17, 47.53, 33.18. ESI MS (methanol) Calcd. 806.43, found 807.52 M+H.

ph

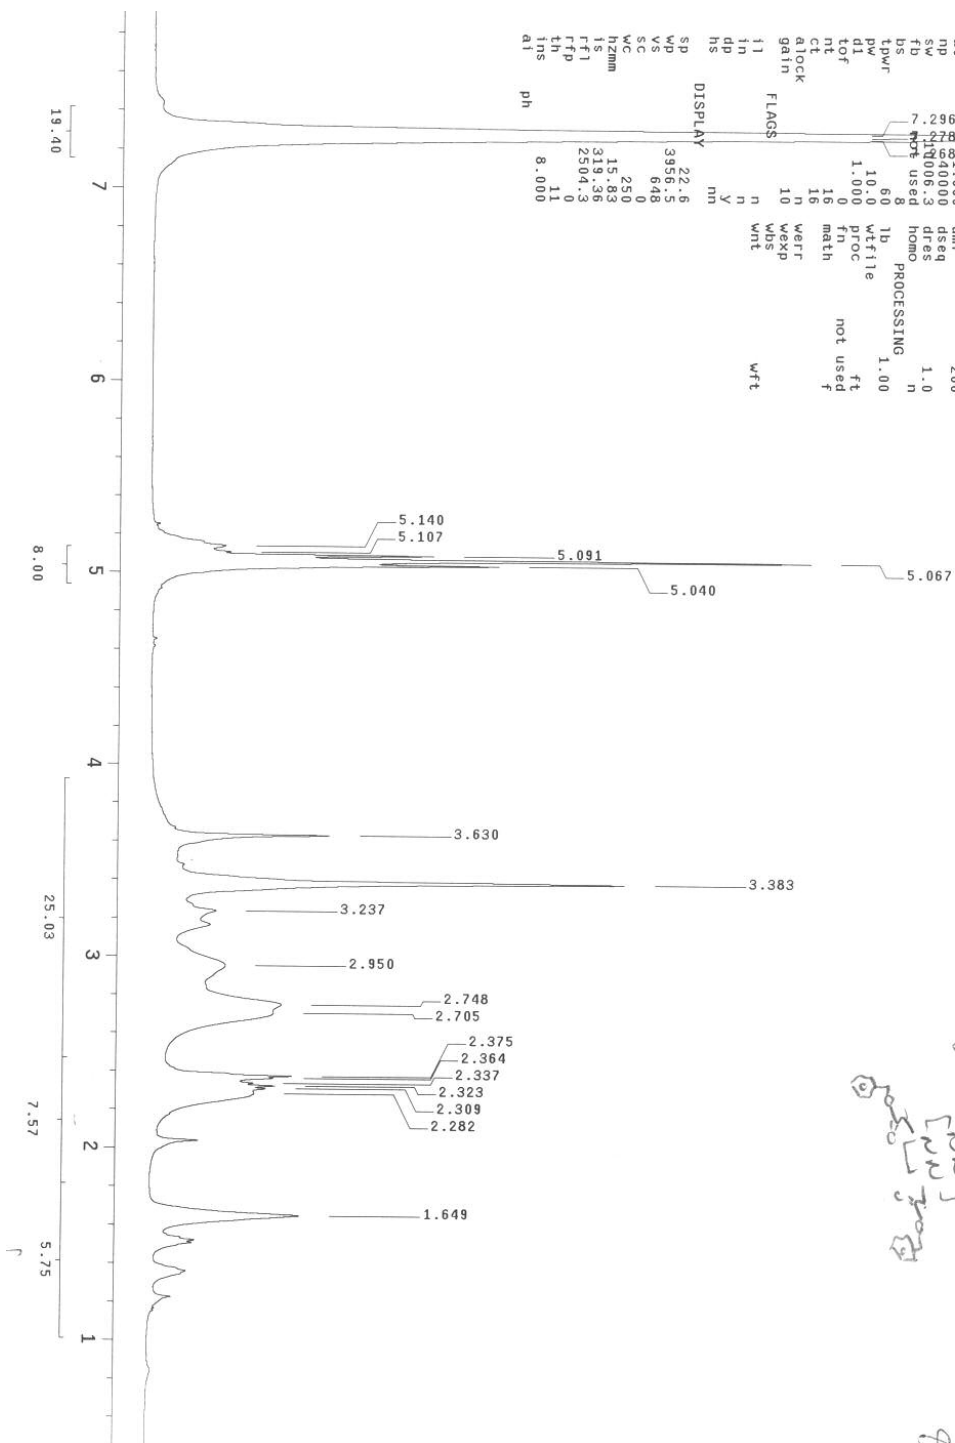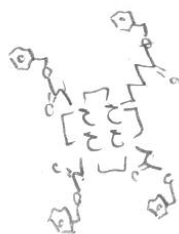

if  $\gamma$  is



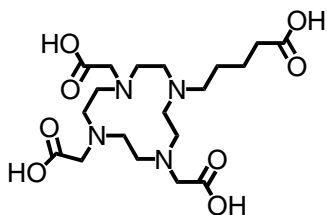

Synthesis of **5**: In a falcon tube was placed **4** (0.165 g, 0.70 mmol), MeOH (10 mL), DCM (10 mL), and Pd/C (0.040 g). The solution was stirred under a balloon of H<sub>2</sub> for two days. The solution was then filtered through celite, the solvent was removed by rotary evaporation providing a 99% yield. <sup>1</sup>H NMR (500 MHz, D<sub>2</sub>O) δ 3.66 (s, 2H), 3.46-2.96 (bm, 22H), 2.28 (t, *J*=7.5 Hz, 2H), 1.60 (s, 2H), 1.48 (m, 2H); <sup>13</sup>C (125 MHz, CDCl<sub>3</sub>) δ 177.86, 174.34, 169.40, 53.91, 53.11, 51.79, 49.93, 49.01, 48.47, 48.19, 33.12, 22.31, 21.34. ESI MS (methanol) Calcd. 446.24, found 469.42 M+Na.

sbiv139  
exp8 s2pul

| SAMPLE      |          | DEC. & VT  |          |
|-------------|----------|------------|----------|
| date        | 2006     | dfrq       | 125.672  |
| solvent     | 020      | dn         | C13      |
| file        | exp      | dpwr       | 30       |
| ACQUISITION |          |            |          |
| sfrq        | 499.749  | dof        | 0        |
| tr          | 499.749  | dm         | mm       |
| at          | 1.399    | dof        | 200      |
| np          | 4000     | dseq       | 1.0      |
| sw          | 10000.3  | dres       | 1.0      |
| ts          | not used | hom        | n        |
| bs          | 8        | PROCESSING |          |
| tpwr        | 60       | lb         | 1.00     |
| pw          | 10.0     | wtfile     | 1.00     |
| dl          | 11000    | proc       | ft       |
| int         | 16       | math       | not used |
| ct          | 16       | weir       | n        |
| alock       | 10       | wexp       | wt       |
| gain        | 10       | wnt        | wt       |
| il          | 0        | wt         | wt       |
| dp          | 0        | wt         | wt       |
| hs          | 0        | wt         | wt       |
| DISPLAY     |          |            |          |
| sp          | 1.39     | wt         | wt       |
| vp          | 2.00     | wt         | wt       |
| vs          | 1.75     | wt         | wt       |
| vc          | 250      | wt         | wt       |
| h2mm        | 10.47    | wt         | wt       |
| is          | 520.50   | wt         | wt       |
| rfi         | 250.4.3  | wt         | wt       |
| rfp         | 15       | wt         | wt       |
| th          | 15       | wt         | wt       |
| ins         | 2.000    | wt         | wt       |
| ai          | ph       | wt         | wt       |

Handwritten notes: *exp 8 s2pul*

Handwritten note: *17139*

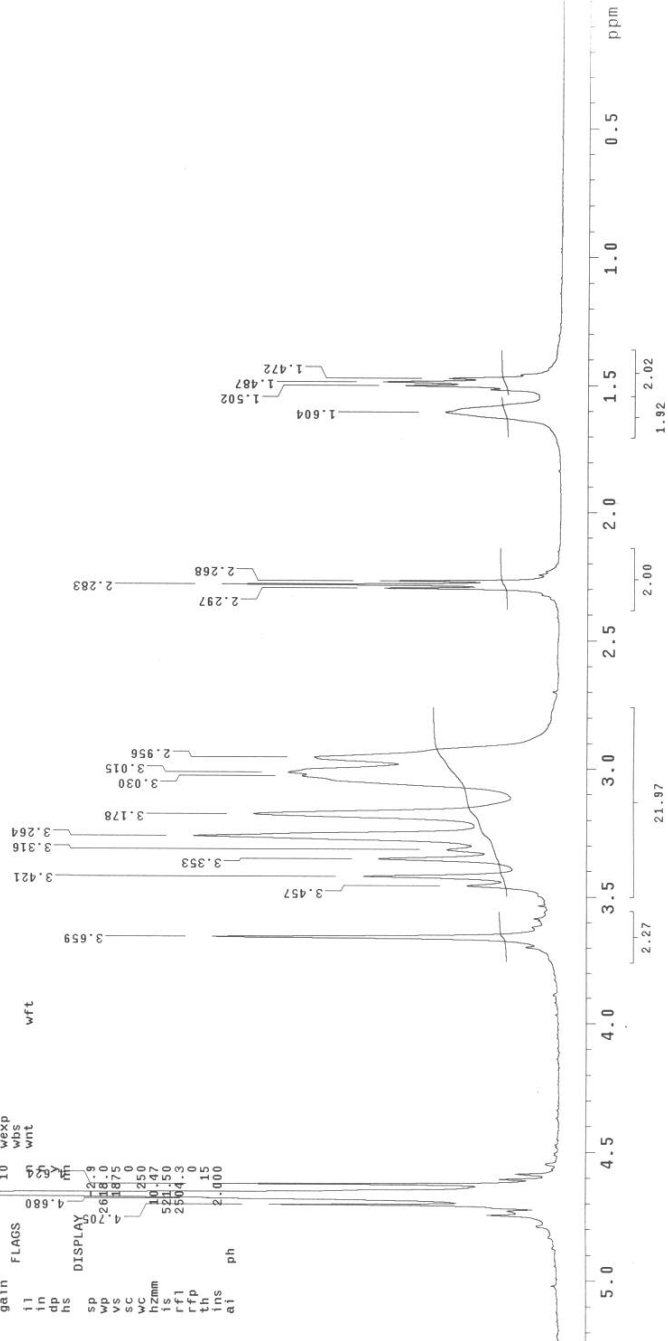



C13.std p-500 hb\_5mm RT nonspin

exp4 s2pul

SAMPLE DEC. & VI  
date Aug 11 2006 dfrq 499.749  
solvent D2O dn H1  
F1 ACQUISITION exp dpr 36  
sfrq 125.673 dm my  
at C13 dmf W  
sw 50000.0 dres S952  
fb not used homo 1.0  
bs 8  
tpr 48  
d1 63.1000  
tof 0  
nt 74  
clock 528  
gain not used  
flags not used  
wbs  
wnt

DISPLAY #  
SP 1327.8  
WD 2752.8  
VC 88  
SC 0  
WC 250  
h2mm 90.83  
f1 18060.7  
rfd 50  
th 180.06  
nm cdc ph 16

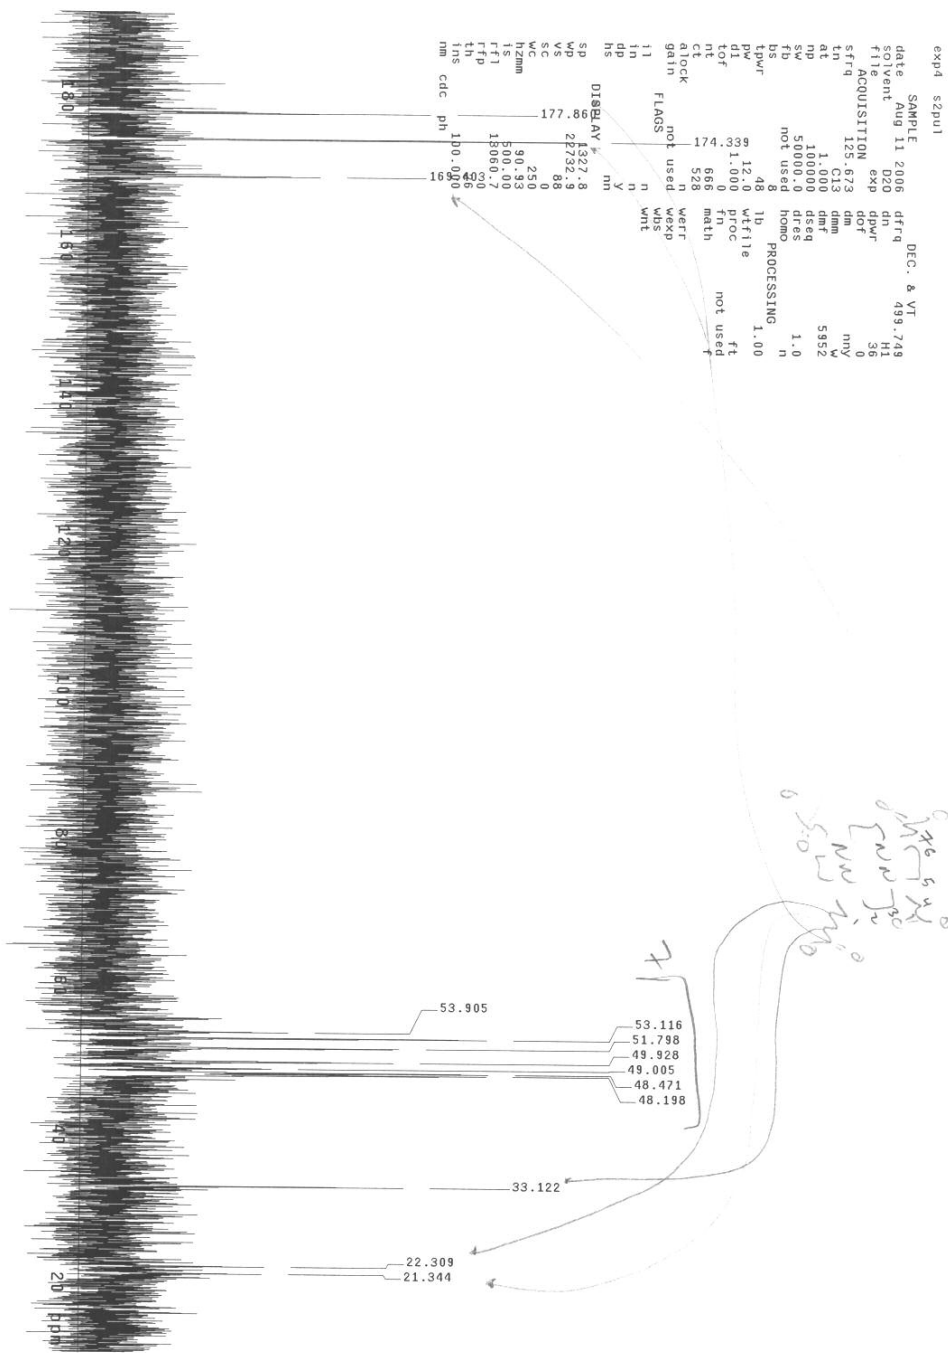

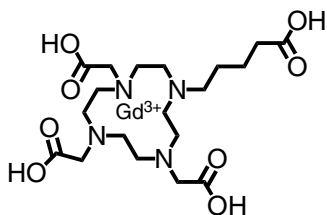

Synthesis of **6**: In a falcon tube was placed **5** (0.165 g, 0.37 mmol), milliQ H<sub>2</sub>O (4 mL), and GdCl<sub>3</sub> (0.151 g, 0.4 mmol). The pH was adjusted to 6.5 using ammonium hydroxide and the solution was stirred for 2 days. The solution was then brought up to pH 10, the ppt was centrifuged at 4000 rpm for 10 minutes, and the liquid decanted. The water was removed by lyophilization giving a white powder (mass and yield inaccurate because of NaOH salt in the final product from the pH adjustment). ESI MS (negative mode) (methanol) Calcd. 600.16, found 600.21 M.

### Synthesis and characterization of protein polymer-based CA.

The conjugation reaction between the primary amines on the lysine residues in the protein polymer and the carboxyl group on the Gd(III) chelator was performed in conical reaction vials (Chemglass) with “V”-shaped stir bars (Chemglass). The protein was dissolved at 1 mg/mL in a filtered 0.1 M MES, 0.5 M NaCl, pH 6.0 buffer. A 3.8-fold molar excess of the Gd(III) chelator per lysine residue on the protein was used. The peptide coupling agents, 1-Ethyl-3-[3-dimethylaminopropyl]carbodiimide Hydrochloride (EDC) (Pierce) and N-hydroxysulfosuccinimide (Sulfo-NHS) (Pierce) were added in 8-fold and 9-fold excess of the protein polymer by weight. The reaction stirred for ~36 hours and was then continuously dialyzed against deionized water for three days and

lyophilized. The dried conjugate was resuspended in deionized water, filtered with a 0.45  $\mu\text{m}$  PTFE syringe filter, and lyophilized again. MALDI-TOF MS was used to analyze the conjugation reaction using a sinapinic acid matrix dissolved in a 1:1 solution of acetonitrile and deionized water. A mass of  $\sim 26,800$  Da for the conjugate corresponds to approximately 8.6 Gd(III) chelators per protein molecule.

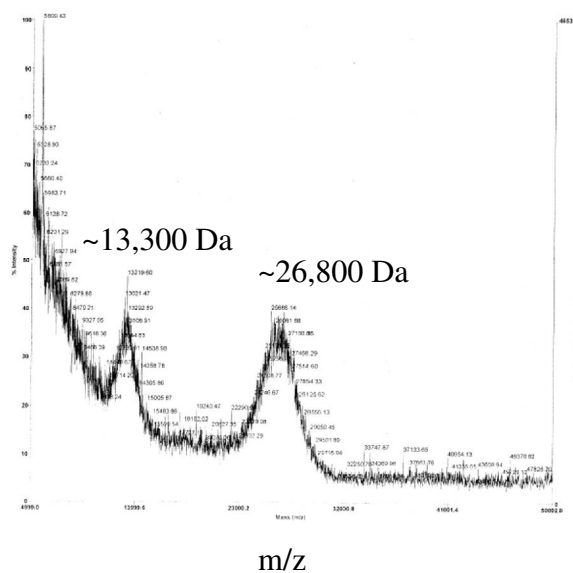

**Figure S5:** MALDI of conjugate. The mass for  $z=1$  is  $\sim 26,800$  Da.

## Relaxivity

Relaxivity measurements were performed in triplicate using a Bruker mq60 NMR Analyzer (Bruker Canada, Milton, Ont., Canada) at 37  $^{\circ}\text{C}$ . Inductively coupled plasma mass spectrometry (ICP-MS) was used to determine Gd(III) concentration.

## Synthesis of the hydrogels

A 5.8% (w/v) hydrogel was made in 5 mm NMR tubes. The hydrogel with **7** contained  $5.30 \times 10^{-7}$  mol of Gd(III). The remaining weight was made up of the

unconjugated protein polymer, **1**. The solids were dissolved in 650  $\mu\text{L}$  of .01 M sodium phosphate, 0.15 M sodium chloride, pH 7.4 buffer and then put in the NMR tube. 45  $\mu\text{L}$  of 25% aqueous glutaraldehyde (Calbiochem, San Diego, CA) was added, the NMR tube was sonicated, and then put on ice. The solution gelled within minutes.

### **MR Imaging of the hydrogels**

The hydrogels were MR imaged on a 14.1 T/600 MHz Bruker Ultrashield Biospin with an 89 mm bore size. The imaging parameters are multiscan multiecho (MSME); repetition time (TR), 250.0 ms; echo time (TE), 10.2 ms; number of excitations (NEX), 2; slice thickness (SI), 1.00/1.25 mm; field of view (FOV), 1.5 cm; matrix size (MTX), 256.
